# Supplementary material
Source: publisher site journal article supplement (https://www.dovepress.com/article/supplementary_file/595236/595236%20Revised%20%2509supplementary%20material.docx)
Supplement: Supplementary file 1 [file 595236%20Revised%20%2509supplementary%20material.docx]

**Table S1.** Primer sequences used for RT-PCR

| **Gene** | **GenBankNo.** | **Primer** | **Nucleotide sequence(5’-3’)** |
| --- | --- | --- | --- |
| Mouse β-actin | NM_007393.5 | F  R | GATACTGCTCTGGCTCCTAGC  GACTCATCGTACTCCTGCTTGC |
| Mouse IL-6 | NM_001314054.1 | F  R | CACAAGTCCGGAGAGGAGAC  CAGAATTGCCATTGCACAAC |
| Mouse IL-1β | NM_008361.4 | F  R | CGCAGCAGCACATCACAAGAGC  TGTCCTCATCCTGGAAGGTCCACG |
| Mouse TNF-α | NM_013693.2 | F  R | ACCCTCACACTCAGATCATCTT  GGTTGTCTTTGAGATCCATGC |
| Mouse IL-10 | NM_010548.2 | F  R | F: TGCTAACCGACTCCTTAATGCA  R: TTCTCACCCAGGGAATTCAAA |

F,forward; R,reverse
